Carol Wiley Cassella, M.D., Editor

## Anthropology Note 342/56:799

James M. Berry, M.D.

I  
In many larger settlements  
is found a temple, monolithic  
where priests and acolytes do pray,  
amass'd behind magnetic locks  
in monochrome (but never red)  
for enigmatic sorcery  
On willing supplicants;  
Only the frail, alone unmasked  
present themselves to be exposed,  
their hidden depths revealed to all  
in blinding light, by knife and saw  
with hope of purging ill within;  
Just wisps of smoke and char remain  
from electrical excision;  
No cry escapes enfolding hush,  
and speak they not of secrets dark  
nor of a death in pain...

---

From the Vanderbilt University School of Medicine, Nashville, Tennessee. james.berry@vanderbilt.edu

Accepted for publication October 19, 2014.

Copyright © 2014, the American Society of Anesthesiologists, Inc. Wolters Kluwer Health, Inc. All Rights Reserved. Anesthesiology 2015; 122:1176
